# Supplementary material for: Real-time in situ monitoring as a tool for comparison of electrochemical advanced oxidation processes for the decolourisation of azo and indigoid dyes
Source: Royal Society of Chemistry journal article supplement (doi:10.1039/d4ra07657e), 2024-01-01
Supplement: d4ra07657e1.pdf [file d4ra07657e1.pdf]

# Use of real-time *in situ* monitoring as a tool for comparison of electrochemical advanced oxidation processes for the decolourisation of azo and indigoid dyes

Chelsea M. Schroeder, Taylor M. Koehler, and Nicholas E. Leadbeater\*

Department of Chemistry, University of Connecticut, 55 North Eagleville Road, Storrs, CT 06269-3060, USA.

\*E-mail: [nicholas.leadbeater@uconn.edu](mailto:nicholas.leadbeater@uconn.edu)

## SUPPORTING INFORMATION

### TABLE OF CONTENTS

|                                                            |           |
|------------------------------------------------------------|-----------|
| <b><i>STL Files for 3D Printed Apparatus</i></b> .....     | <b>2</b>  |
| <b><i>Indigo Carmine (IC)</i></b> .....                    | <b>3</b>  |
| <b><i>Potassium Indigotrisulfonate (KIT)</i></b> .....     | <b>4</b>  |
| <b><i>Food Yellow 6 (FY6)</i></b> .....                    | <b>5</b>  |
| <b><i>Methyl Orange (MO)</i></b> .....                     | <b>6</b>  |
| <b><i>Ethyl Orange (EO)</i></b> .....                      | <b>7</b>  |
| <b><i>Acid Yellow 36 (AY36)</i></b> .....                  | <b>8</b>  |
| <b><i>Acid Red 29 (AR29)</i></b> .....                     | <b>9</b>  |
| <b><i>Acid Red 176 (AR176)</i></b> .....                   | <b>10</b> |
| <b><i>Sulfanilic Acid Azochromotrop (SPADNS)</i></b> ..... | <b>11</b> |
| <b><i>First order rate constants</i></b> .....             | <b>12</b> |

## **STL Files for 3D Printed Apparatus**

.stl Files for the 3D-Printed Continuous Monitoring System can be accessed at:

<https://drive.google.com/drive/folders/1mJG3-UcBzAMPNOvbM13GWpU37FFQ-Xp4?usp=sharing>

## Indigo Carmine (IC)

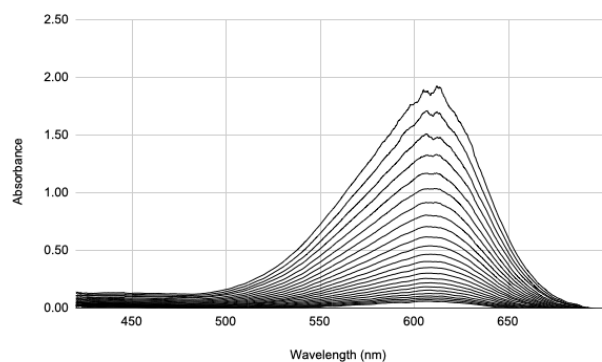

**Figure 1:** AO absorbance spectrum of IC. Conditions: graphite anode, graphite cathode, [IC] = 100  $\mu$ M, [Na<sub>2</sub>S<sub>2</sub>O<sub>8</sub>] = 14 mM, stirring = 1000 rpm, I = 5 mA, overlay spectrum recorded every minute from 6 - 30 min. Trial 1 of 3.

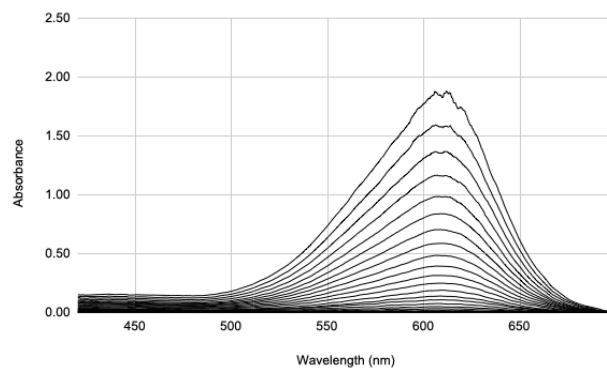

**Figure 2:** EAP absorbance spectrum of IC. Conditions: BDD anode, graphite cathode, [IC] = 100  $\mu$ M, [Na<sub>2</sub>S<sub>2</sub>O<sub>8</sub>] = 14 mM, stirring = 1000 rpm, I = 5 mA, overlay spectrum recorded every minute from 5 - 30 min. Trial 1 of 3.

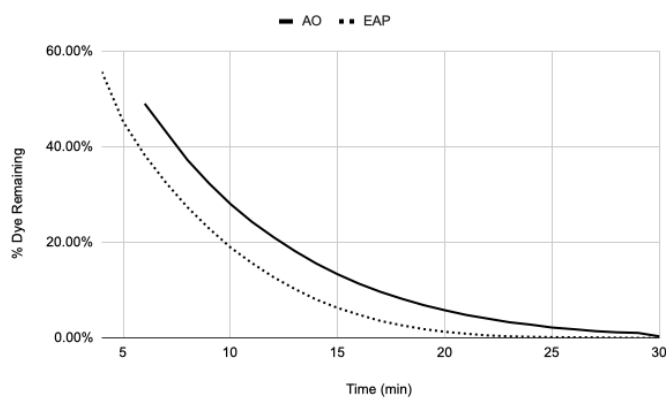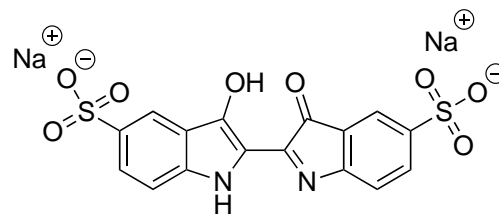

**Figure 3:** AO- and EAP-mediated decolourisation of IC as a function of time at a  $\lambda_{max}$  = 606.31 nm.

## Potassium Indigotrisulfonate (KIT)

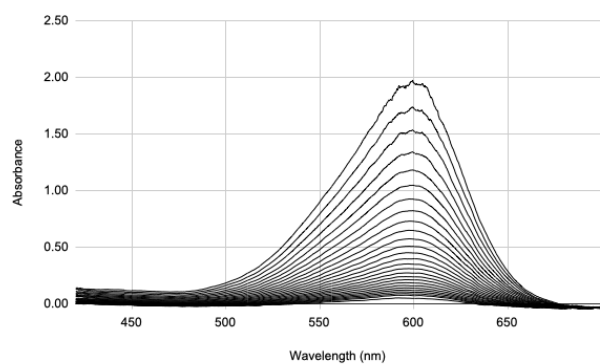

**Figure 4:** AO absorbance spectrum of KIT. Conditions: graphite anode, graphite cathode, [KIT] = 100  $\mu$ M, [Na<sub>2</sub>S<sub>2</sub>O<sub>8</sub>] = 14 mM, stirring = 1000 rpm, I = 5 mA, overlay spectrum recorded every minute from 3 - 30 min. Trial 1 of 3.

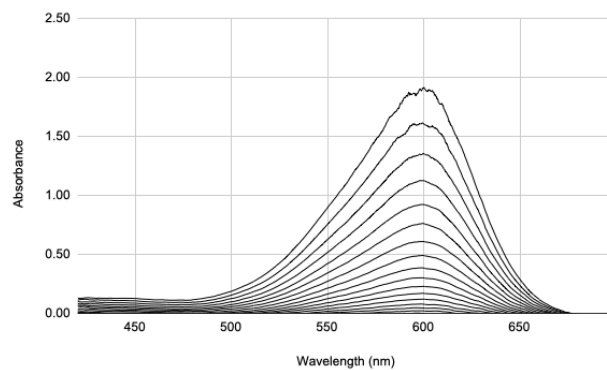

**Figure 5:** EAP absorbance spectrum of KIT. Conditions: BDD anode, graphite cathode, [KIT] = 100  $\mu$ M, [Na<sub>2</sub>S<sub>2</sub>O<sub>8</sub>] = 14 mM, stirring = 1000 rpm, I = 5 mA, overlay spectrum recorded every minute from 2 - 30 min. Trial 1 of 3.

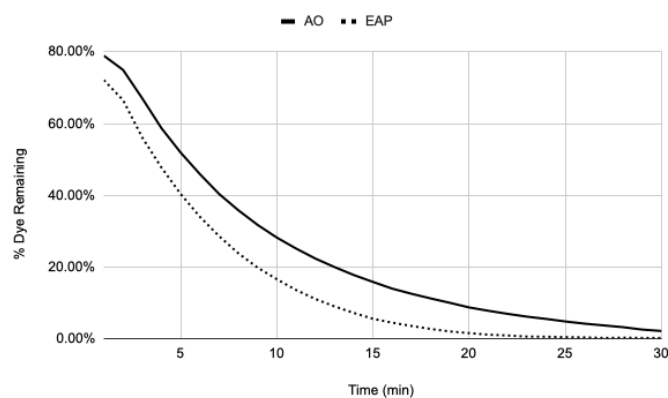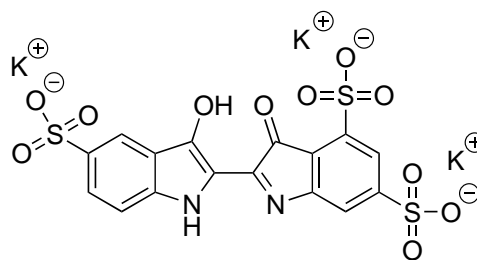

**Figure 6:** AO- and EAP-mediated decolourisation of KIT as a function of time at a  $\lambda_{max}$  = 599.44 nm.

## Food Yellow 6 (FY6)

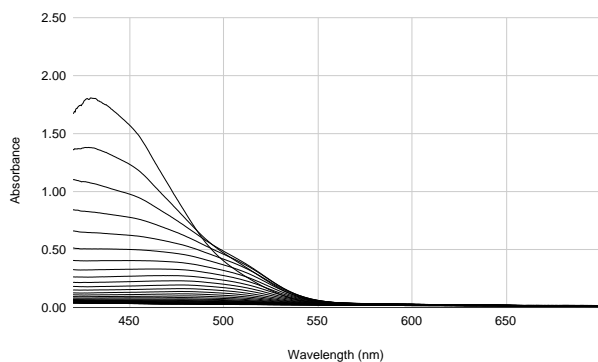

**Figure 7:** AO absorbance spectrum of FY6. Conditions: graphite anode, graphite cathode, [FY6] = 100  $\mu$ M, [Na<sub>2</sub>S<sub>2</sub>O<sub>8</sub>] = 14 mM, stirring = 1000 rpm, I = 5 mA, overlay spectrum recorded every minute from 1 - 30 min. Trial 1 of 3.

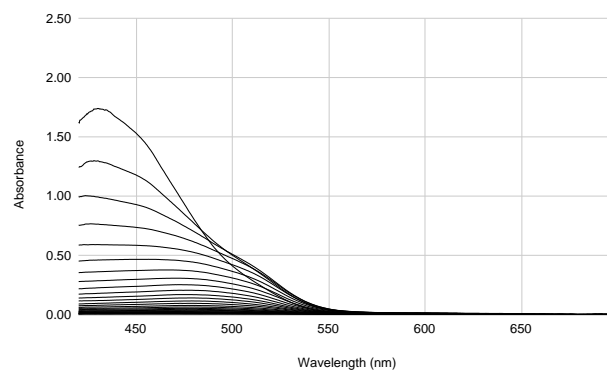

**Figure 8:** EAP absorbance spectrum of FY6. Conditions: BDD anode, graphite cathode, [FY6] = 100  $\mu$ M, [Na<sub>2</sub>S<sub>2</sub>O<sub>8</sub>] = 14 mM, stirring = 1000 rpm, I = 5 mA, overlay spectrum recorded every minute from 1 - 30 min. Trial 1 of 3.

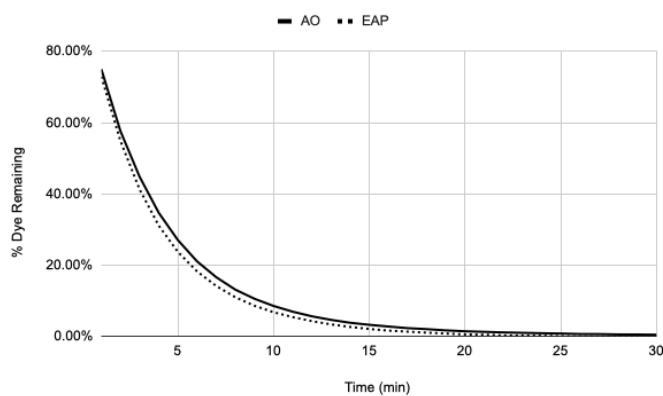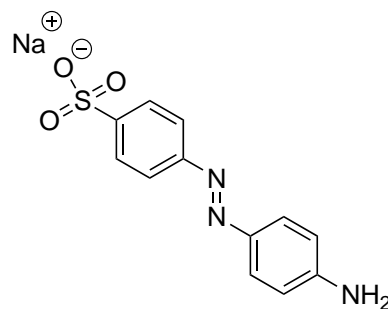

**Figure 9:** AO- and EAP-mediated decolourisation of FY6 as a function of time at a  $\lambda_{max}$  = 425.15 nm.

## Methyl Orange (MO)

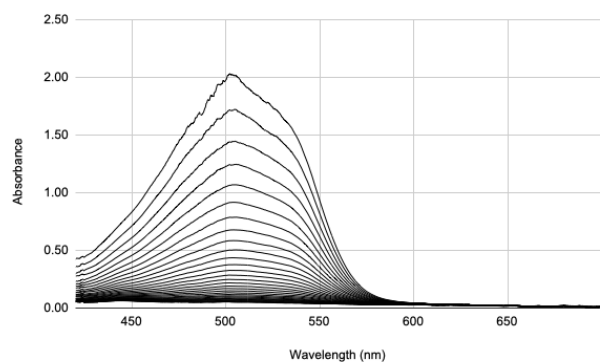

**Figure 10:** AO absorbance spectrum of MO. Conditions: graphite anode, graphite cathode,  $[MO] = 100 \mu\text{M}$ ,  $[\text{Na}_2\text{S}_2\text{O}_8] = 14 \text{ mM}$ , stirring = 1000 rpm,  $I = 5 \text{ mA}$ , overlay spectrum recorded every minute from 7 - 40 min. Trial 1 of 3.

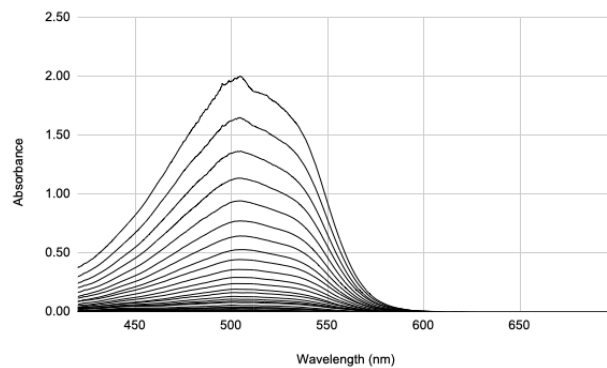

**Figure 11:** EAP absorbance spectrum of MO. Conditions: BDD anode, graphite cathode,  $[MO] = 100 \mu\text{M}$ ,  $[\text{Na}_2\text{S}_2\text{O}_8] = 14 \text{ mM}$ , stirring = 1000 rpm,  $I = 5 \text{ mA}$ , overlay spectrum recorded every minute from 6 - 40 min. Trial 1 of 3.

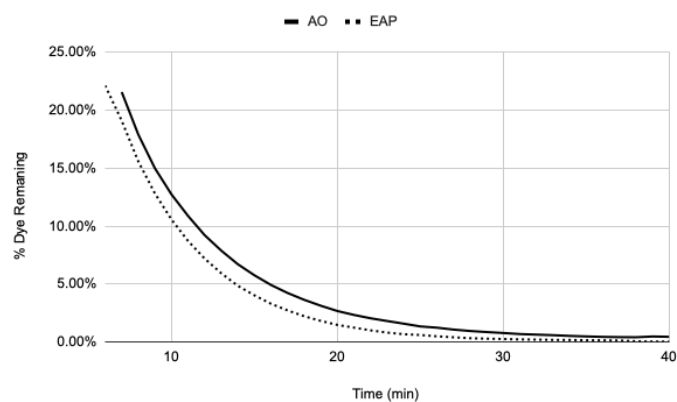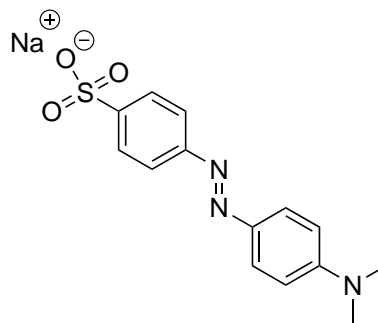

**Figure 12:** AO- and EAP-mediated decolourisation of MO as a function of time at a  $\lambda_{\text{max}}$  pH 0.62 = 436.82 nm,  $\lambda_{\text{max}}$  pH 7 = 507.66 nm.

## Ethyl Orange (EO)

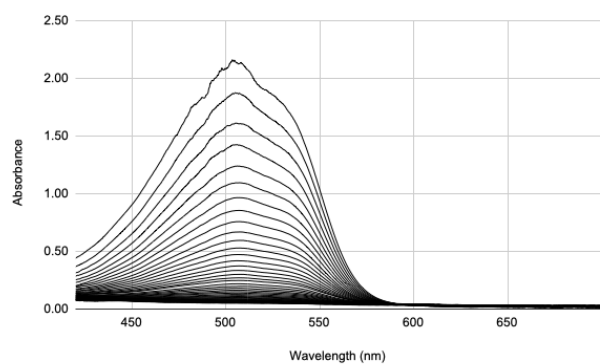

**Figure 13:** AO absorbance spectrum of EO. Conditions: graphite anode, graphite cathode, [EO] = 100  $\mu$ M, [Na<sub>2</sub>S<sub>2</sub>O<sub>8</sub>] = 14 mM, stirring = 1000 rpm, I = 5 mA, overlay spectrum recorded every minute from 4 - 45 min. Trial 1 of 3.

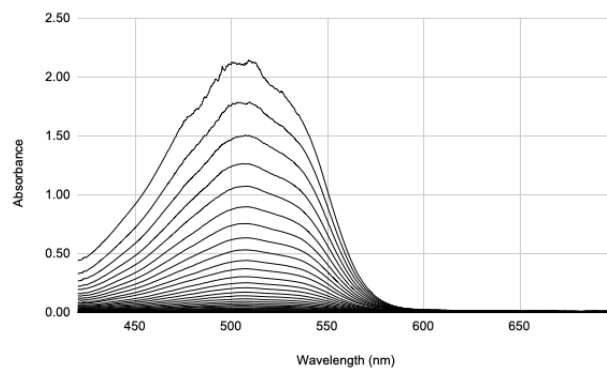

**Figure 14:** EAP absorbance spectrum of EO. Conditions: BDD anode, graphite cathode, [EO] = 100  $\mu$ M, [Na<sub>2</sub>S<sub>2</sub>O<sub>8</sub>] = 14 mM, stirring = 1000 rpm, I = 5 mA, overlay spectrum recorded every minute from 3 - 45 min. Trial 1 of 3.

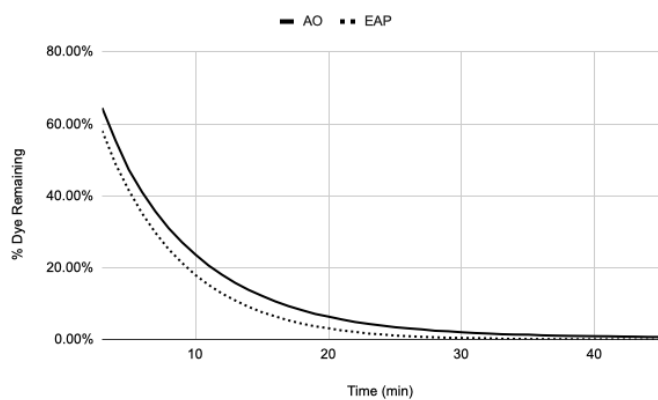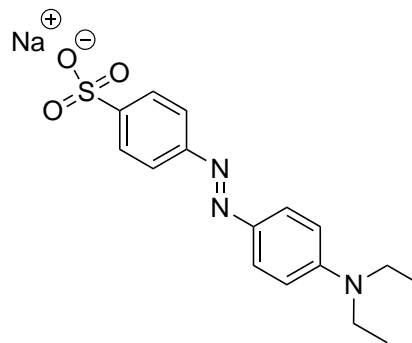

**Figure 15:** AO- and EAP-mediated decolourisation of EO as a function of time at a  $\lambda_{max}$  = 508.09 nm.

## Acid Yellow 36 (AY36)

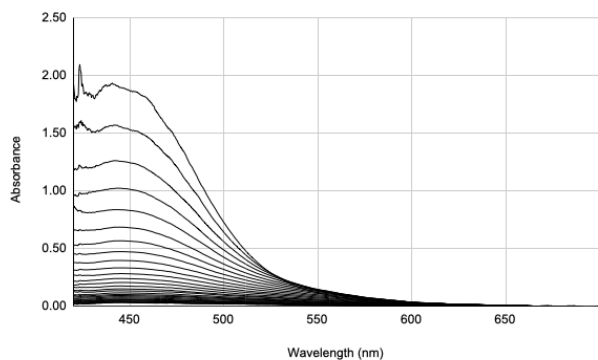

**Figure 16:** AO absorbance spectrum of AY36. Conditions: graphite anode, graphite cathode, [AY36] = 100  $\mu$ M, [Na<sub>2</sub>S<sub>2</sub>O<sub>8</sub>] = 14 mM, stirring = 1000 rpm, I = 5 mA, overlay spectrum recorded every minute from 2 - 35 min. Trial 1 of 3.

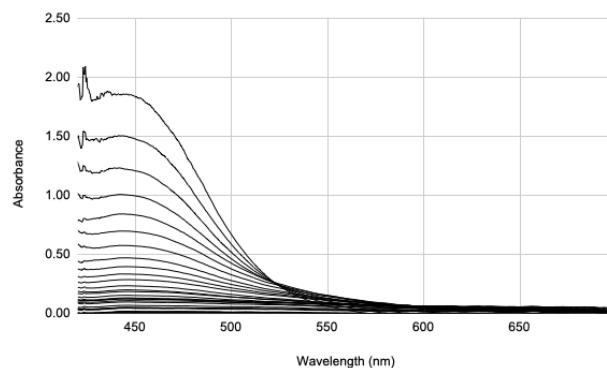

**Figure 17:** EAP absorbance spectrum of AY36. Conditions: BDD anode, graphite cathode, [AY36] = 100  $\mu$ M, [Na<sub>2</sub>S<sub>2</sub>O<sub>8</sub>] = 14 mM, stirring = 1000 rpm, I = 5 mA, overlay spectrum recorded every minute from 2 - 30 min. Trial 1 of 3.

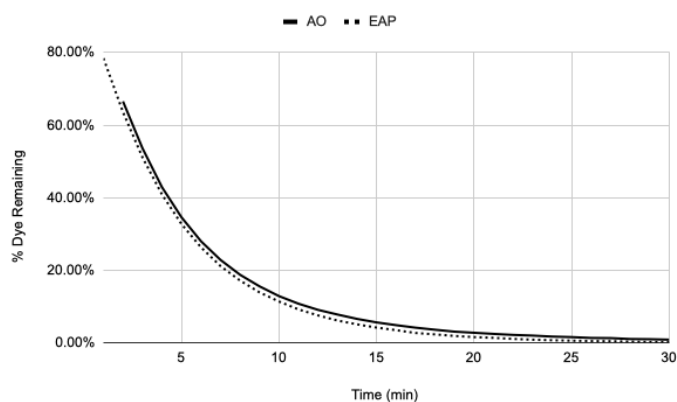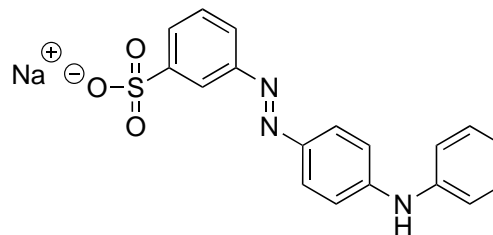

**Figure 18:** AO- and EAP-mediated decolourisation of AY36 as a function of time at a  $\lambda_{max}$  = 443.00 nm.



## Acid Red 29 (AR29)

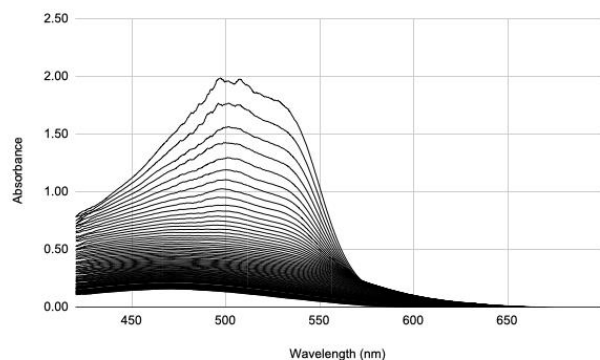

**Figure 19:** AO absorbance spectrum of AR29. Conditions: graphite anode, graphite cathode, [AR29] = 100  $\mu$ M, [Na<sub>2</sub>S<sub>2</sub>O<sub>8</sub>] = 14 mM, stirring = 1000 rpm, I = 5 mA, overlay spectrum recorded every minute from 8 - 90 min. Trial 1 of 3.

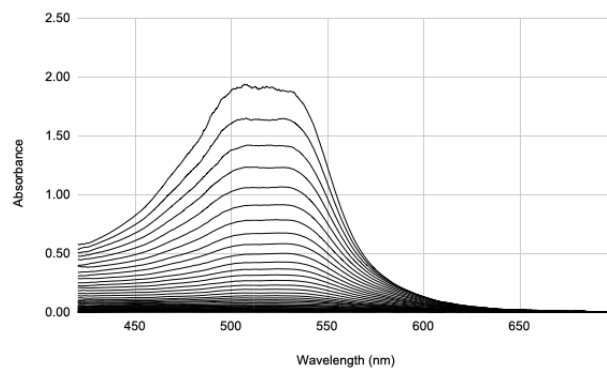

**Figure 20:** EAP absorbance spectrum of AR29. Conditions: BDD anode, graphite cathode, [AR29] = 100  $\mu$ M, [Na<sub>2</sub>S<sub>2</sub>O<sub>8</sub>] = 14 mM, stirring = 1000 rpm, I = 5 mA, overlay spectrum recorded every minute from 7 - 45 min. Trial 1 of 3.

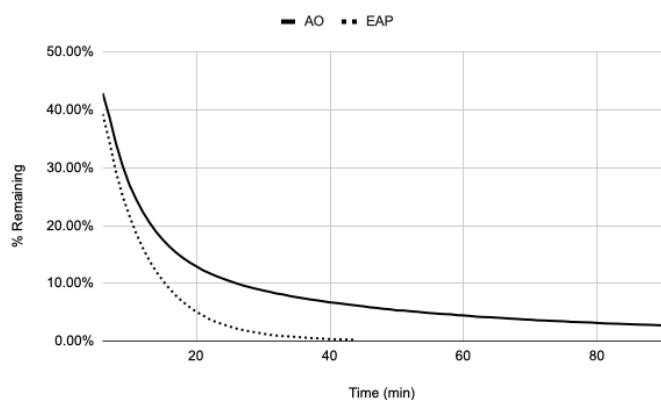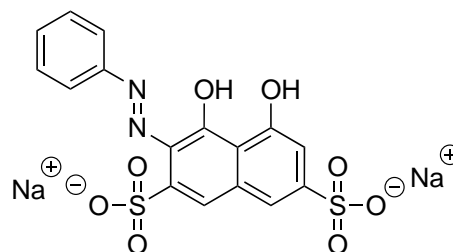

**Figure 21:** AO- and EAP-mediated decolourisation of AR29 as a function of time at a  $\lambda_{max}$  = 507.73 nm.

## Acid Red 176 (AR176)

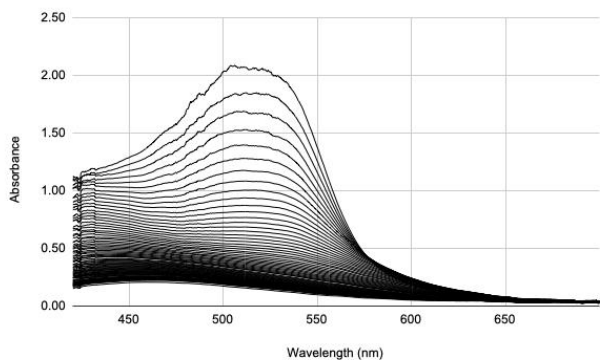

**Figure 22:** AO absorbance spectrum of AR176. Conditions: graphite anode, graphite cathode, [AR176] = 100  $\mu$ M, [Na<sub>2</sub>S<sub>2</sub>O<sub>8</sub>] = 14 mM, stirring = 1000 rpm, I = 5 mA, overlay spectrum recorded every minute from 9 - 90 min. Trial 1 of 3.

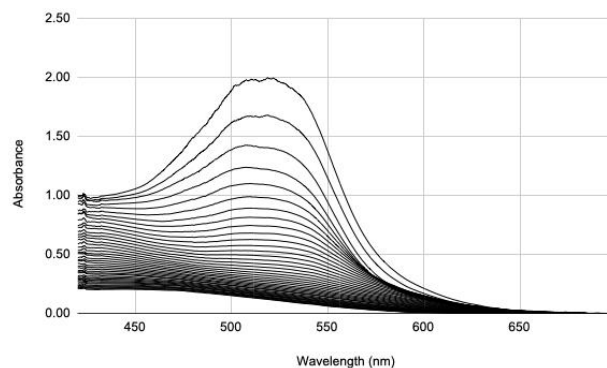

**Figure 23:** EAP absorbance spectrum of AR176. Conditions: BDD anode, graphite cathode, [AR176] = 100  $\mu$ M, [Na<sub>2</sub>S<sub>2</sub>O<sub>8</sub>] = 14 mM, stirring = 1000 rpm, I = 5 mA, overlay spectrum recorded every minute from 9 - 50 min. Trial 1 of 3.

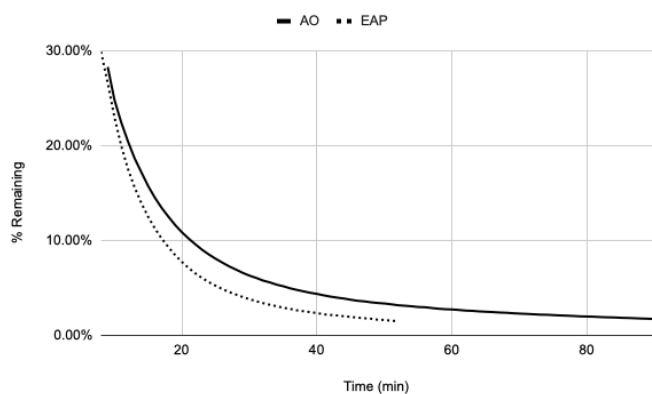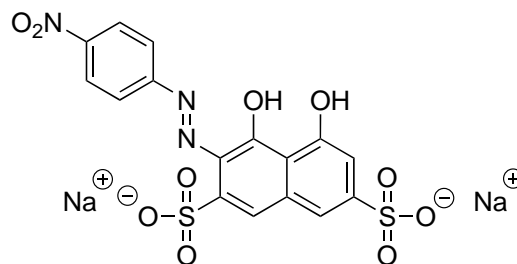

**Figure 24:** AO- and EAP-mediated decolourisation of AR176 as a function of time at a  $\lambda_{max}$  = 516.26 nm.

## Sulfanilic Acid Azochromotrop (SPADNS)

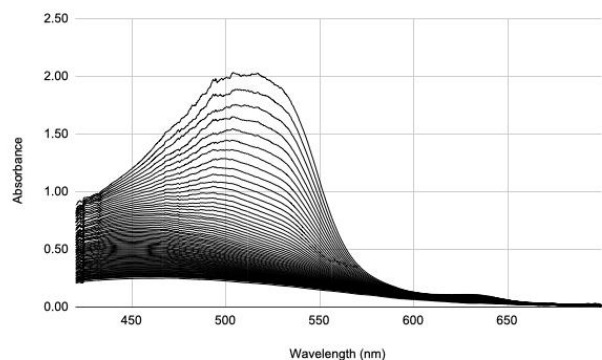

**Figure 25:** AO absorbance spectrum of SAPDNS. Conditions: graphite anode, graphite cathode, [SAPDNS] = 100 $\mu$ M, [Na<sub>2</sub>S<sub>2</sub>O<sub>8</sub>] = 14 mM, stirring = 1000 rpm, I = 5 mA, overlay spectrum recorded every minute from 9 - 90 min. Trial 1 of 3.

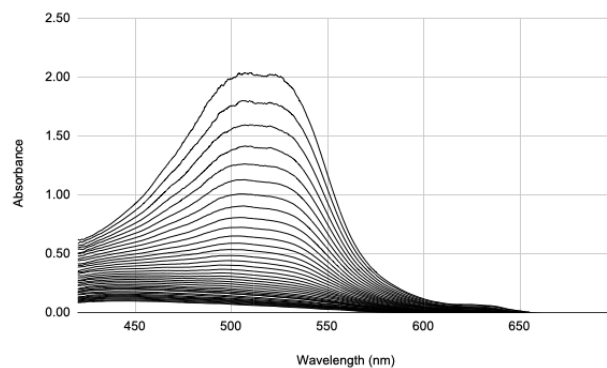

**Figure 26:** EAP absorbance spectrum of SAPDNS. Conditions: BDD anode, graphite cathode, [SAPDNS] = 100 $\mu$ M, [Na<sub>2</sub>S<sub>2</sub>O<sub>8</sub>] = 14 mM, stirring = 1000 rpm, I = 5 mA, overlay spectrum recorded every minute from 7 - 45 min. Trial 1 of 3.

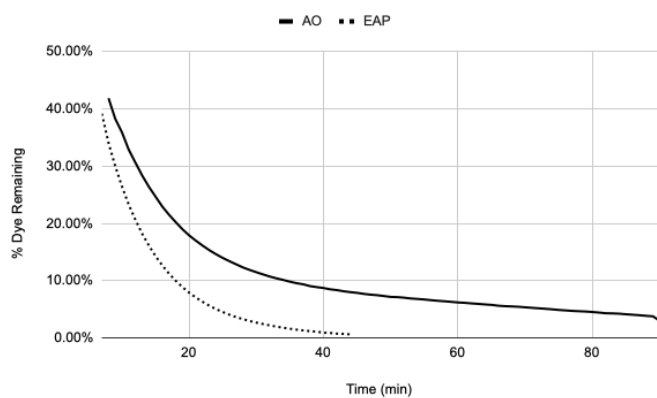

**Figure 27:** AO- and EAP-mediated decolourisation of SAPDNS as a function of time at a  $\lambda_{max}$  = 508.09 nm.

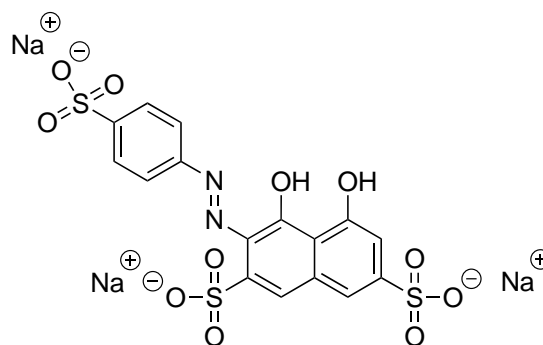

## First order rate constants

**Table 1:** First order rate constants at 20 min for nine dyes under two decolourisation protocols. AO conditions: Graphite anode and cathode, [Dye] = 100  $\mu\text{M}$ , [Na<sub>2</sub>S<sub>2</sub>O<sub>8</sub>] = 14 mM, stirring = 1000 rpm, I = 5 mA. EAP conditions: BDD anode, graphite cathode, [Dye] = 100  $\mu\text{M}$ , [Na<sub>2</sub>S<sub>2</sub>O<sub>8</sub>] = 14 mM, stirring = 1000 rpm, I = 5 mA.

|                          | Indigo Carmine         | Potassium indigotrisulfonate | Food Yellow 6          | Methyl Orange          | Ethyl Orange           | Acid Yellow 36         | Acid Red 29            | Acid Red 176           | SPADNS                 |
|--------------------------|------------------------|------------------------------|------------------------|------------------------|------------------------|------------------------|------------------------|------------------------|------------------------|
| AO (k s <sup>-1</sup> )  | 2.38 x10 <sup>-3</sup> | 2.04 x10 <sup>-3</sup>       | 3.58 x10 <sup>-3</sup> | 3.02 x10 <sup>-3</sup> | 2.30 x10 <sup>-3</sup> | 3.00 x10 <sup>-3</sup> | 1.71 x10 <sup>-3</sup> | 1.85 x10 <sup>-3</sup> | 1.43 x10 <sup>-3</sup> |
| EAP (k s <sup>-1</sup> ) | 3.65 x10 <sup>-3</sup> | 3.48 x10 <sup>-3</sup>       | 4.44 x10 <sup>-3</sup> | 3.52 x10 <sup>-3</sup> | 2.89 x10 <sup>-3</sup> | 3.48 x10 <sup>-3</sup> | 2.48 x10 <sup>-3</sup> | 2.13 x10 <sup>-3</sup> | 2.12 x10 <sup>-3</sup> |
